# Supplementary material for: Hypoxia-sensitive long noncoding RNA CASC15 promotes lung tumorigenesis by regulating the SOX4/β-catenin axis
Source: Research Square preprint supplement (doi:10.21203/rs.3.rs-51984/v3), 2020-12-18
Supplement: Supplementary file 1 [file 0d462ae43b8f0f6e401a9317.pdf]

## Supplementary Information

### Supplemental Figure legends

**Figure S1.** qRT-PCR analysis of CASC15 RNA levels in A549 and H1299 cells, which were treated with si-Control or si-CASC15 for 48 hours.

**Figure S2.** Western blot analysis of SOX4 protein levels in A549 and H1299 cells, which were treated with si-Control or si-SOX4 for 48 hours.

Figure S3. Tumor volume in nude mice injected with A549 and H129 cells with stable knockdown of CASC15, or concurrent overexpression of SOX4.

**Figure S4.** Representative IHC staining of HIF-1 $\alpha$  and ISH staining of CASC15 in A549-shControl and A549-shHIF1A xenograft tissues.

**Figure S5.** Western blot analysis of SOX4 protein levels in CASC15-overexpressing H1299 cells and control cells.

**Figure S6.** RNA-IP assay detecting potential interactions between CASC15 RNA and WDR5 protein in A549 and H1299 cells. U1 snRNA, which was reported not binding to WDR5, was used as a negative control.

**Table S1.** The characteristics of 35 NSCLC patients included in the tissue microarray in our study.

**Table S2.** Primer sequences for qRT-PCR.

Figure S1

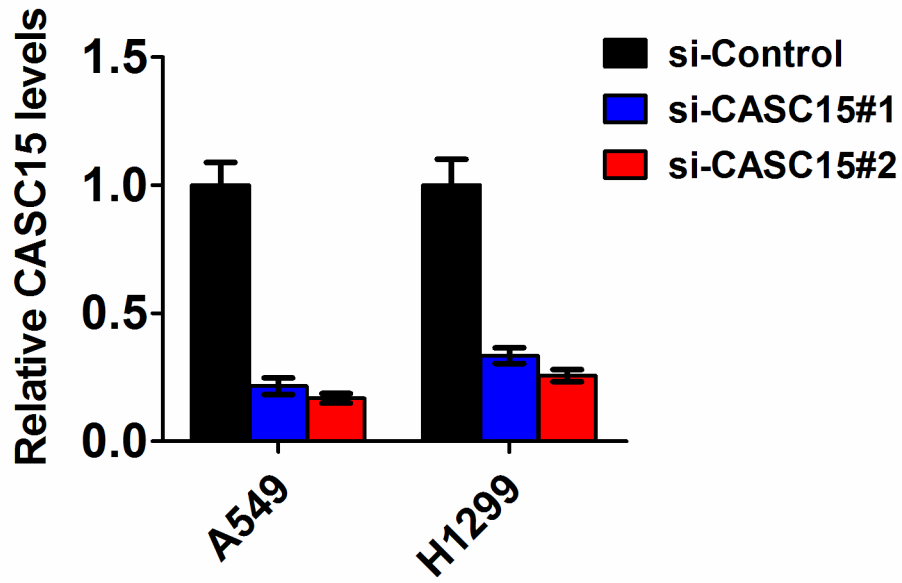

Figure S2

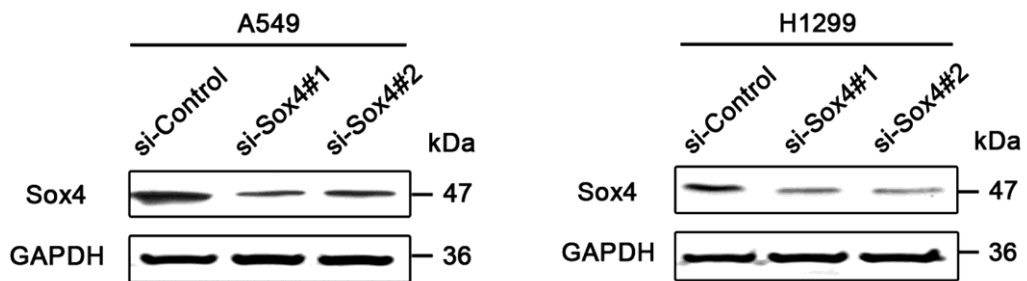

Figure S3

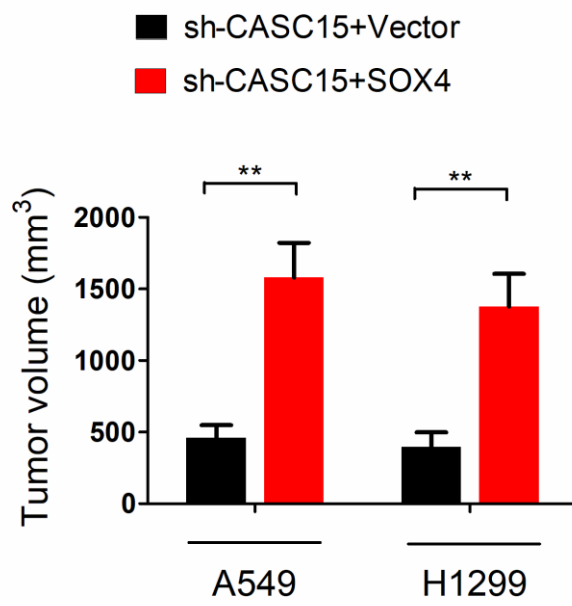

Figure S4

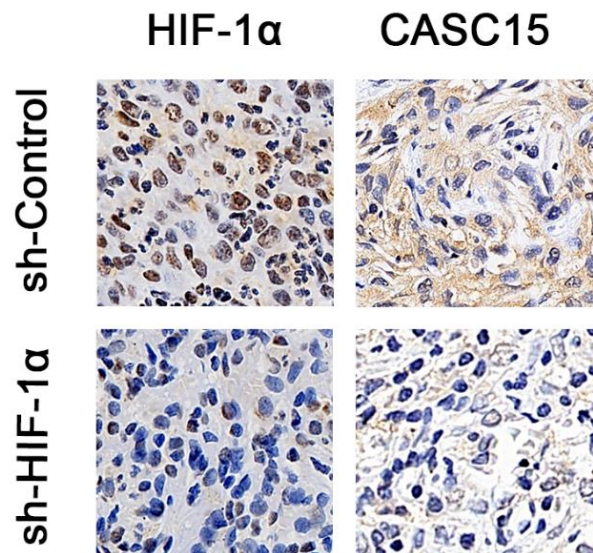

Figure S5

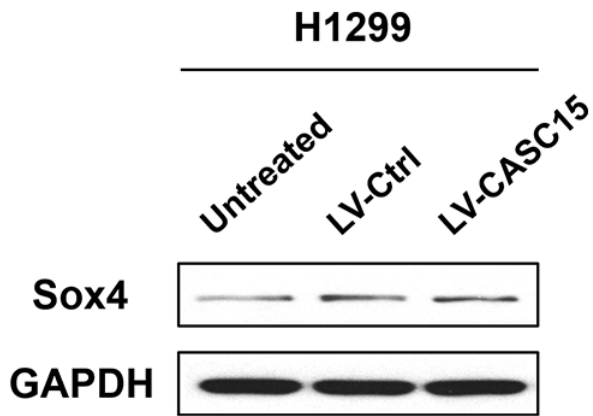

Figure S6

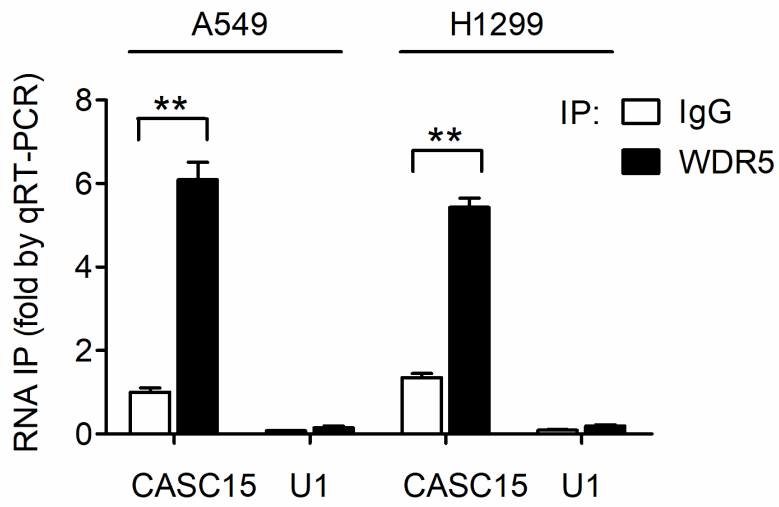

**Table S1**

| Characteristics               | Case (n, %)             |
|-------------------------------|-------------------------|
| <b>Age (years)</b>            | Media: 60; Range: 47-74 |
| < 60                          | 17 (48.6)               |
| ≥ 60                          | 18 (51.4)               |
| <b>Gender</b>                 |                         |
| Male                          | 20 (57.1)               |
| Female                        | 15 (42.9)               |
| <b>Pathologic type</b>        |                         |
| Adenocarcinoma                | 19 (54.3)               |
| Squamous cell carcinoma       | 11 (31.4)               |
| Others                        | 5 (14.3)                |
| <b>Differentiated degree</b>  |                         |
| Well                          | 8 (22.9)                |
| Media                         | 15 (42.9)               |
| Poor                          | 12 (34.3)               |
| <b>T stage</b>                |                         |
| I-II                          | 25 (71.4)               |
| III-IV                        | 10 (28.6)               |
| <b>Tumor size</b>             |                         |
| < 3 cm                        | 8 (22.9)                |
| ≥ 3 cm                        | 27 (77.1)               |
| <b>Lymph nodes metastasis</b> |                         |
| No                            | 24 (68.6)               |
| Yes                           | 11 (31.4)               |

**Table S2**

| Primer Sequences for qRT-PCR |         |                                |
|------------------------------|---------|--------------------------------|
| Gene                         | Strand  | Sequences                      |
| CASC15                       | forward | 5'-TTAGGGAAAGCCTTCTTTAGGGAT-3' |
|                              | reverse | 5'-CTCCCAGCCCCTATTCCTTT-3'     |
| HIF1A                        | forward | 5'-TTTTTCAAGCAGTAGGAATTGGA-3'  |
|                              | reverse | 5'-GTGATGTAGTAGCTGCATGATCG-3'  |
| SOX4                         | forward | 5'-CCAAATCTTTTGGGGACTTTT-3'    |
|                              | reverse | 5'-CTGGCCCCTCAACTCCTC-3'       |

|          |         |                              |
|----------|---------|------------------------------|
| CTNNB1   | forward | 5'-ACAGGGAAGACATCACTGAGCC-3' |
|          | reverse | 5'-CAGTGGGATGGTGGGTGTAAGA-3' |
| 18S rRNA | forward | 5'-GTAACCCGTTGAACCCATT-3'    |
|          | reverse | 5'-CCATCCAATCGGTAGTAGCG-3'   |
| GAPDH    | forward | 5'-TCGGAGTCAACGGATTTGGT-3'   |
|          | reverse | 5'-TCGCCCCACTTGATTTTGA-3'    |
